# Supplementary material
Source: PubMed Central journal article supplement (PMC3473282)

## SUPPLEMENTAL MATERIAL

Supplemental Figures S1 and S2 (see below) show that in CIC-2 the  $G_{\text{norm}}([H^+]_o)$  increased as the  $[H^+]_o$  increased, reached a maximum when  $[H^+]_o$  was  $10^{-6.4}$  M but with further increases in  $[H^+]_o$  the  $G_{\text{norm}}$  decreased. This behaviour indicates protonation of at least 2 sites, S1 and S2. Protonation of S1 causes an increase in  $G_{\text{norm}}$  while protonation of S2 decreases  $G_{\text{norm}}$ .

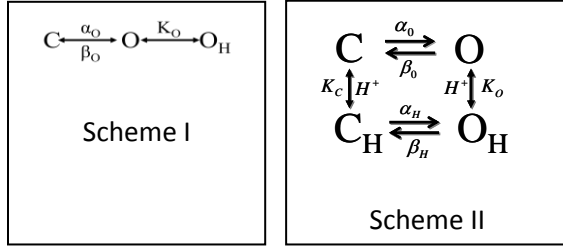

Therefore, in order to test if external  $H^+$  stabilizes the open state in CIC-2, two schemes (I and II) were built to describe the behaviour of the fast gate (S1) under different external  $[H^+]_o$ . If CIC-2 gating follows Scheme I, then the open probability

is given by:

$$P_{OI} = \frac{1 + \frac{[H^+]_o}{K_o}}{1 + \frac{\beta_o}{\alpha_o} + \frac{[H^+]_o}{K_o}} \quad \text{Equation 1}$$

where  $K_o$  is the equilibrium constant of protonation for open channels and  $\beta_o/\alpha_o$  is the ratio of rate constants for the  $C \leftrightarrow O$  transition. To account for the decrease in  $G_{\text{norm}}$  due to protonation of S2 at very acidic  $pH_o$  ( $<6.4$ ) the function describing  $G_{\text{norm}}$  was multiplied by  $1/(1 + ([H^+]_o/K_2)^{n_2})$ .  $K_2$  and  $n_2$  are the equilibrium constant for S2 protonation and the Hill coefficient, respectively. Thus,  $G_{\text{norm}}$  was given by:

$$G_{\text{norm}} = P_{OI} \frac{1}{1 + \left(\frac{[H^+]_o}{K_2}\right)^{n_2}} \quad \text{Equation 2}$$

Similarly, if the gating behaves as described in Scheme II, then the open probability is given by:

$$P_{OII} = \frac{1 + \frac{[H^+]_o}{K_o}}{1 + \frac{[H^+]_o}{K_o} + \left(\frac{\beta_o}{\alpha_o}\right) \left(1 + \frac{[H^+]_o}{K_c}\right)} \quad \text{Equation 3}$$

where  $K_o$  and  $K_c$  are the equilibrium constants of protonation for open and closed channels, respectively.  $\beta_o/\alpha_o$  is the ratio of rate constants for the  $C \leftrightarrow O$  transition. To account for the decrease in  $G_{\text{norm}}$  at acidic  $pH_o$  ( $<6.4$ ) due to protonation of S2, the function describing  $P_{OII}$  was multiplied by  $1/(1 + ([H^+]_o/K_2)^{n_2})$ , where  $K_2$  and  $n_2$  are the equilibrium constant for S2 protonation and the Hill coefficient, respectively. Thus,  $G_{\text{norm}}$  was given by:

$$G_{\text{norm}} = P_{\text{OII}} \frac{1}{1 + \left(\frac{[\text{H}^+]_0}{K_2}\right)^{n_2}} \quad \text{Equation 4}$$

**Supplemental Figure S 1.** Scheme I explains  $G_{\text{norm}}([\text{H}^+]_0)$  and  $G_{\text{norm}}(V_m)$  but not  $\tau_c(\text{pH}_0)$ . **A:**  $G_{\text{norm}}$  vs  $[\text{H}^+]_0$  curves at each  $V_m$  were constructed using the interpolated values obtained from fitting  $G_{\text{norm}}(V_m)$  curves with a Boltzmann function (Figure 3B).  $V_m = -20$  to  $-200$  mV in 20 mV increments. **B:** Corrected  $G_{\text{norm}}$  vs  $V_m$  curves at  $[\text{H}^+]_0 = 10^{-9.1}$  ( $\blacktriangledown$ ),  $10^{-8.4}$  ( $\blacktriangle$ ),  $10^{-7.3}$  ( $\bullet$ ), and  $10^{-6.4}$  M ( $\blacksquare$ ). Continuous lines through data in A and B are fits with Equations 2 and 1, respectively. To fit data shown in B with equation 1 we assumed that  $\beta_0/\alpha_0$  varied in an exponential fashion with voltage, as proposed by the rate theory. **C:** Lack of  $V_m$ -dependence of pK. These pK values were obtained from fitting data shown in panel A (open circles) or from fitting data shown in panel B (black line). Closed circles are pK values for protonation of S2. **D:** Ratio of rate constants describing the transition C to O according to Scheme I. Closed symbols are values obtained from fitting data shown in panel A while continuous lines are the values obtained from fitting data shown in panel B. **E:** Equation 5 (continuous line) for  $\tau_c$  according to Scheme I did not explain the  $\tau_c(\text{pH}_0)$  data.

**Supplemental Figure S 2.** Scheme II predicts  $V_m$ -independent protonation and  $V_m$ -dependent chlorination. **A:**  $G_{\text{norm}}$  vs  $[\text{H}^+]_0$  curves at each  $V_m$  were constructed as described in Figure S1A. **B:** Corrected  $G_{\text{norm}}$  vs  $V_m$  curves at  $[\text{H}^+]_0 = 10^{-9.1}$  ( $\blacktriangledown$ ),  $10^{-8.4}$  ( $\blacktriangle$ ),  $10^{-7.3}$  ( $\bullet$ ), and  $10^{-6.4}$  M ( $\blacksquare$ ). Continuous lines through data in panels A and B are fits with Equations 4 and 3, respectively. To fit data shown in B with equation 3 we assumed that  $\beta_0/\alpha_0$  varied in an exponential fashion with voltage, as proposed by the rate theory. **C:** Lack of  $V_m$ -dependence of pK. pK values were obtained from fitting data shown in panel A (open circles) or from fitting data shown in panel B (black line). Closed circles are pK values for protonation of S2. **D:** Ratio of rate constants for the transition C to O according to Scheme II. Closed symbols are values obtained from fitting data shown in panel A, while continuous lines are values obtained from fitting data shown in panel B.

**Supplemental Figure S 3.** Simulations of CIC-2 gating according to Model 1 based on Scheme I. **A:** Complete Model 1 depicting an empty pore (lower row) or a pore occupied by  $\text{Cl}^-$  (upper row). The protopore gate (red sphere) is in the closed position (left column) or the open position (middle and right columns). An open protopore gate can be stabilized by protonation from the extracellular side (right column). Transitions between states are controlled by rated constants weighed by allosteric factors ( $f$ ) that account for the presence of  $\text{Cl}^-$  in the pore.  $K^H_o$ , the equilibrium constant of protonation, was considered  $V_m$ -independent as suggested by analysis of the data using Scheme I (Figure S1). **B:** Simulations of  $I_{\text{Cl}}(t)$  from -200 to -60 mV according to protocol shown in the upper part. **C:** Simulations of the effects of  $[\text{Cl}^-]_i$  on the time course of  $G_{\text{norm}}$  (upper half of the panel). As previously reported  $\tau_c$  was decreased by increasing  $[\text{Cl}^-]_i$  (Sanchez-Rodriguez et al., 2010); this effect is shown in lower half of this panel. **D:** Simulations of the effects of  $[\text{Cl}^-]_o$  on the time course of  $G_{\text{norm}}$  (upper half) and on  $\tau_c$  (lower half). As previously reported, increasing  $[\text{Cl}^-]_o$  has no effect on CIC-2 gating (Sanchez-Rodriguez et al., 2010).

**Supplemental Figure S 4.** Model 1 reproduced the  $[\text{H}^+]_o$ -,  $[\text{Cl}^-]_i$ - and  $[\text{Cl}^-]_o$ -dependency of  $G_{\text{norm}}(V_m)$ .  $G_{\text{norm}}(V_m)$  curves were simulated according to Model 1 under different  $[\text{H}^+]_o$  (panel A), different  $[\text{Cl}^-]_i$  (panel B), and different  $[\text{Cl}^-]_o$  (panel C). Numbers in each plot correspond to M concentrations of these ions.

**Supplemental Figure S 5.** Model 1 did not reproduce the  $[\text{H}^+]_o$  dependence of  $\tau_c$ . **A:**  $G_{\text{norm}}$  at -180 mV and at +60 mV were simulated at  $[\text{H}^+]_o$  ranging between  $10^{-10}$  to  $10^{-6.4}$  M. Note that the closing rate became slower as  $[\text{H}^+]_o$  increased. **B:**  $t_c$  as a function of  $[\text{H}^+]_o$ . Note that contrary to the experimental results (Figure 5G), model 1 predicts a non saturable time constant.

**Supplemental Table 1.** Models that favour opening by protonation of closed channels. The dissociation constant is denoted by  $K_H=k_-/k_+$ .

| Scheme | Open probability | Closing time constant |
|--------|------------------|-----------------------|
|--------|------------------|-----------------------|

|                                                                                                                         |                                                                     |                                                                                                            |
|-------------------------------------------------------------------------------------------------------------------------|---------------------------------------------------------------------|------------------------------------------------------------------------------------------------------------|
| $C \xrightleftharpoons{K_H} O_H$                                                                                        | $\frac{1}{1 + K_H/[H]}$                                             | $\approx \frac{1}{k_{-1}}$ [2]                                                                             |
| $C \xrightleftharpoons{K_H} C_H \xrightleftharpoons[\beta]{\alpha} O_H$                                                 | $\frac{\alpha}{\alpha + \beta + \beta(K_H/[H])}$                    | $\approx \frac{1}{\beta}$                                                                                  |
| $C \xrightleftharpoons{K_H} O_{1H} \xrightleftharpoons[\beta]{\alpha} O_{2H}$                                           | $\frac{\alpha + \beta}{\alpha + \beta + \beta(K_H/[H])}$            | $\approx 2/(k_- + \sqrt{(k_-)^2 - 4(k_- * \beta)})$<br>$\approx 2/(k_- - \sqrt{(k_-)^2 - 4(k_- * \beta)})$ |
| $C \xrightleftharpoons{K_{Cl}} C^{Cl} \xrightleftharpoons[\beta]{\alpha} C_H^{Cl} \xrightleftharpoons{\alpha} O_H^{Cl}$ | $\frac{\alpha}{\alpha + \beta + \beta(K_H/[H])(1 + K_{Cl}/[Cl^-])}$ | $\approx \frac{1}{\beta}$                                                                                  |

Figure S1

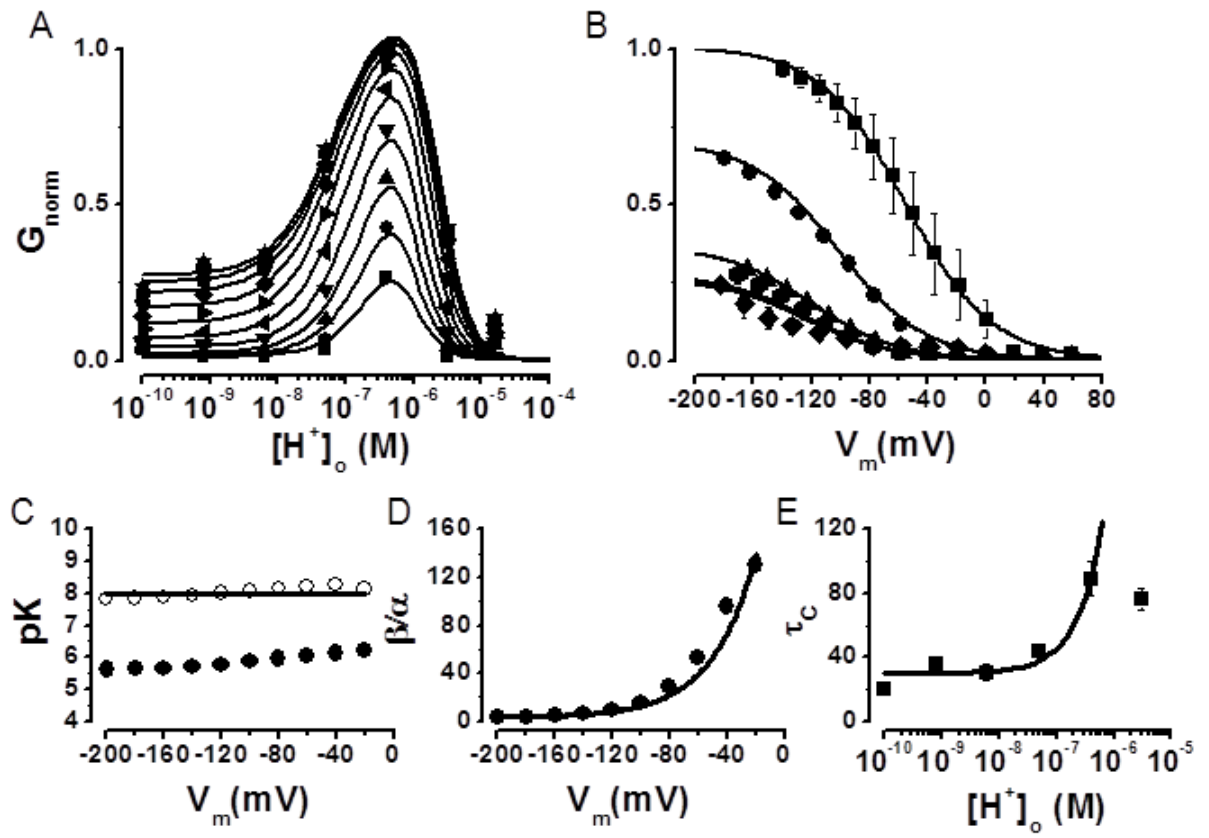

Figure S2

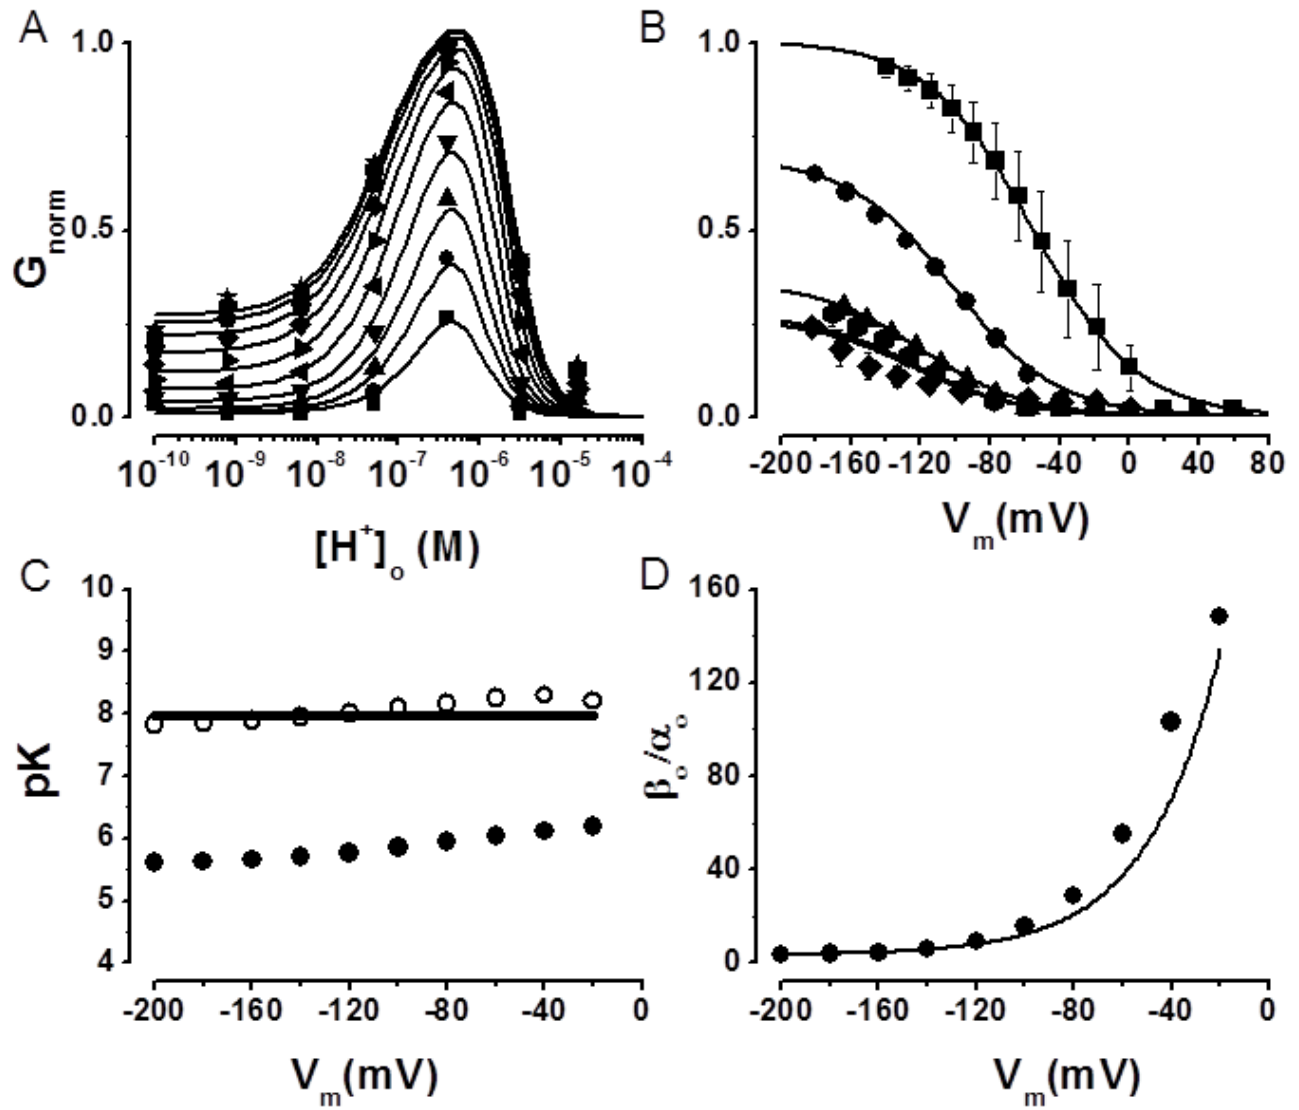

Figure S3

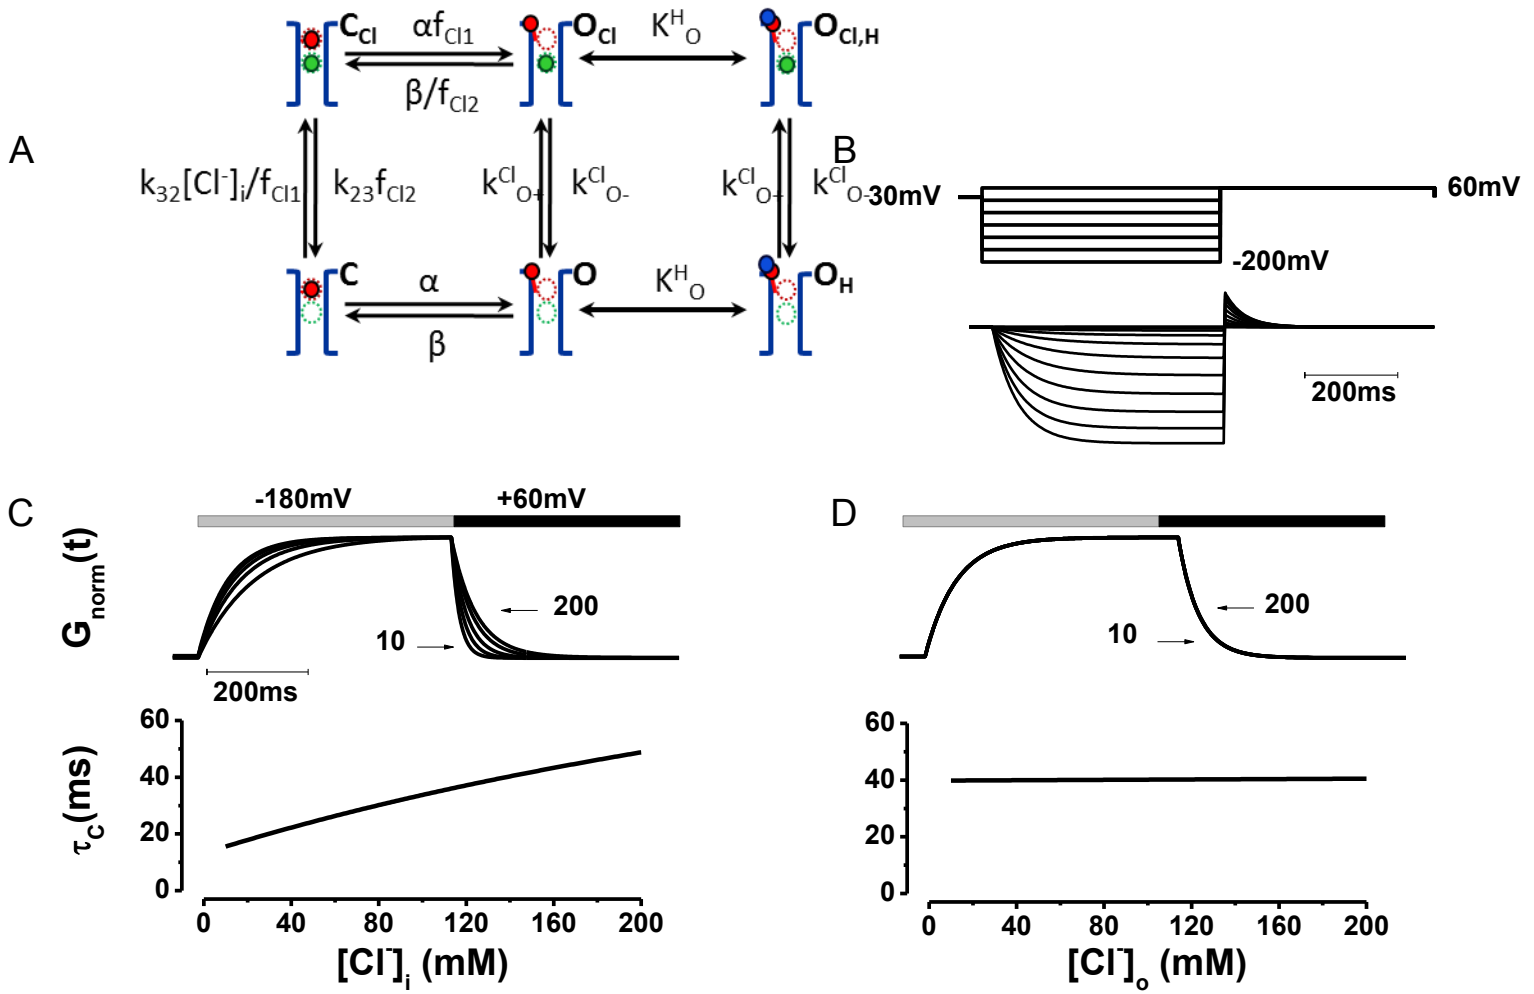

Figure S4

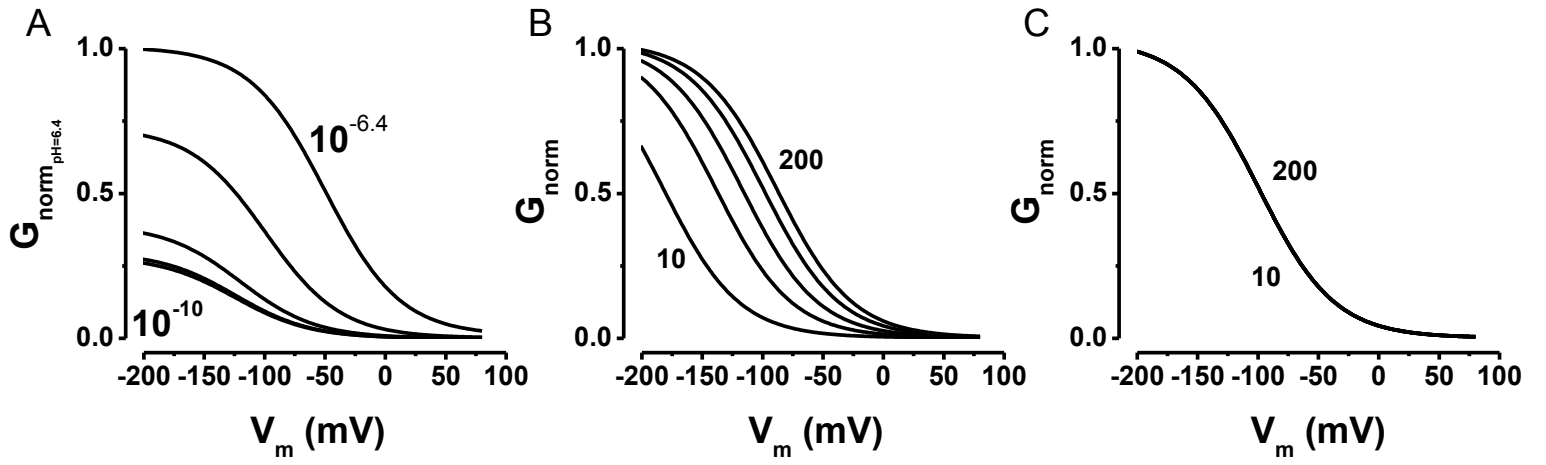



Figure S5

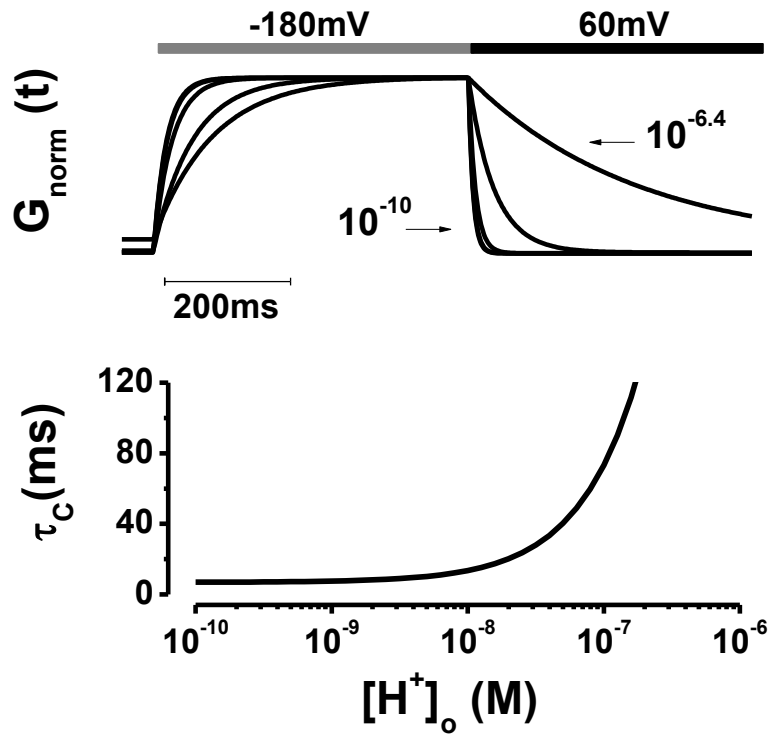

Supplement: tjp0590-4239-SD1.pdf [file tjp0590-4239-SD1.pdf]
